# Supplementary material for: A data-model synthesis to explain variability in calcificationobserved during a CO 2 perturbation mesocosm experiment
Source: Copernicus journal article supplement (doi:10.5194/bg-2016-405), 2016-09-26
Supplement: Supplementary file [file bg-2016-405-AC1-supplement.pdf]

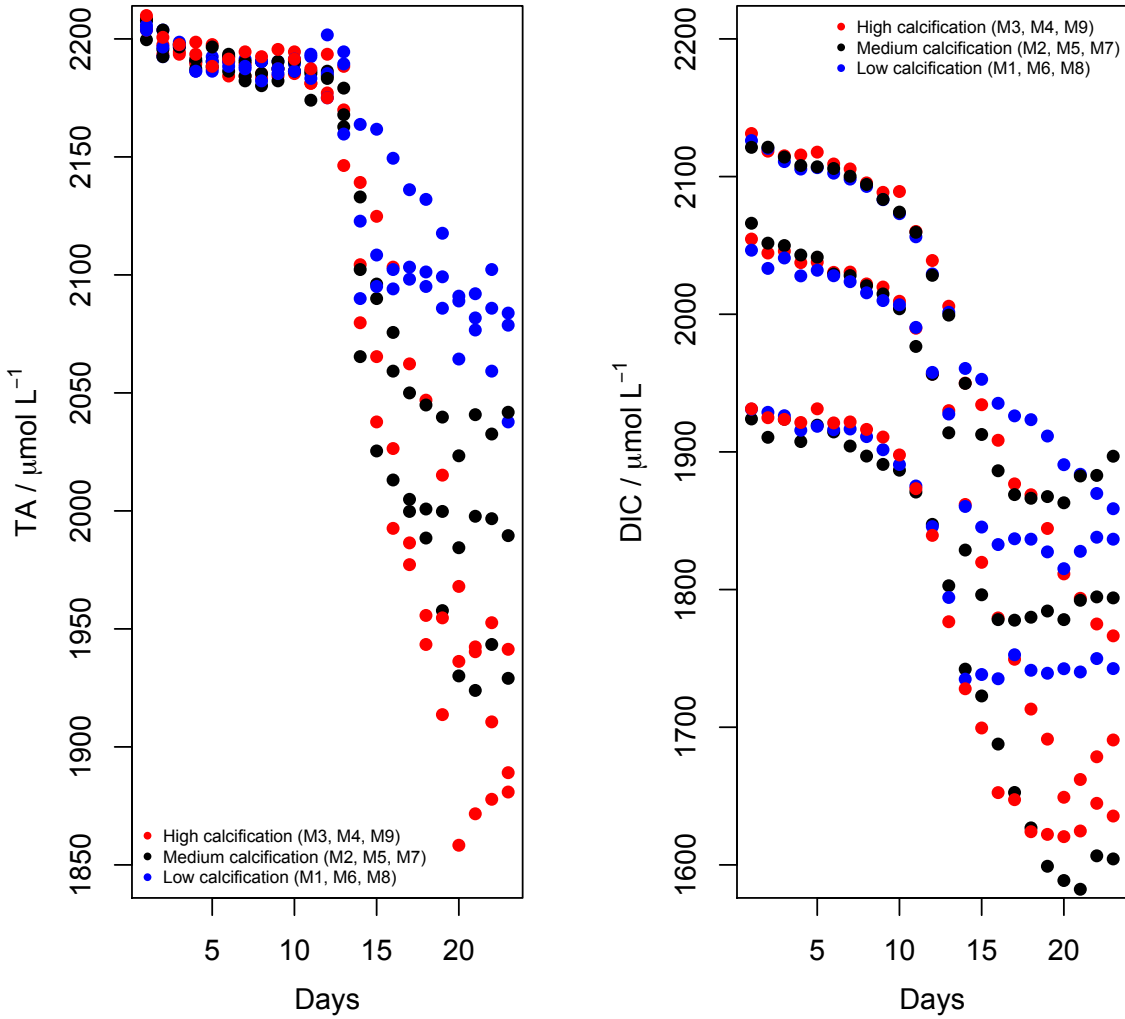

**Figure 1.** DIC (dissolved inorganic carbon) and TA (total alkalinity) observations. Red solid circles represent data from mesocosms (M3, M4, M9) with high calcification rates. Black solid circles depict observations of mesocosms from medium calcification case (M2, M5, M7) and blue circles show data from mesocosms (M1, M6, M8) with low calcification rates.
